# Supplementary material for: Technical note: Validation of Aleppo pine transpiration rate measurements using the heat ratio method under laboratory conditions
Source: Copernicus journal article supplement (doi:10.5194/hess-2022-328), 2022-09-16
Supplement: Supplementary file [file hess-2022-328-AC1-supplement.pdf]

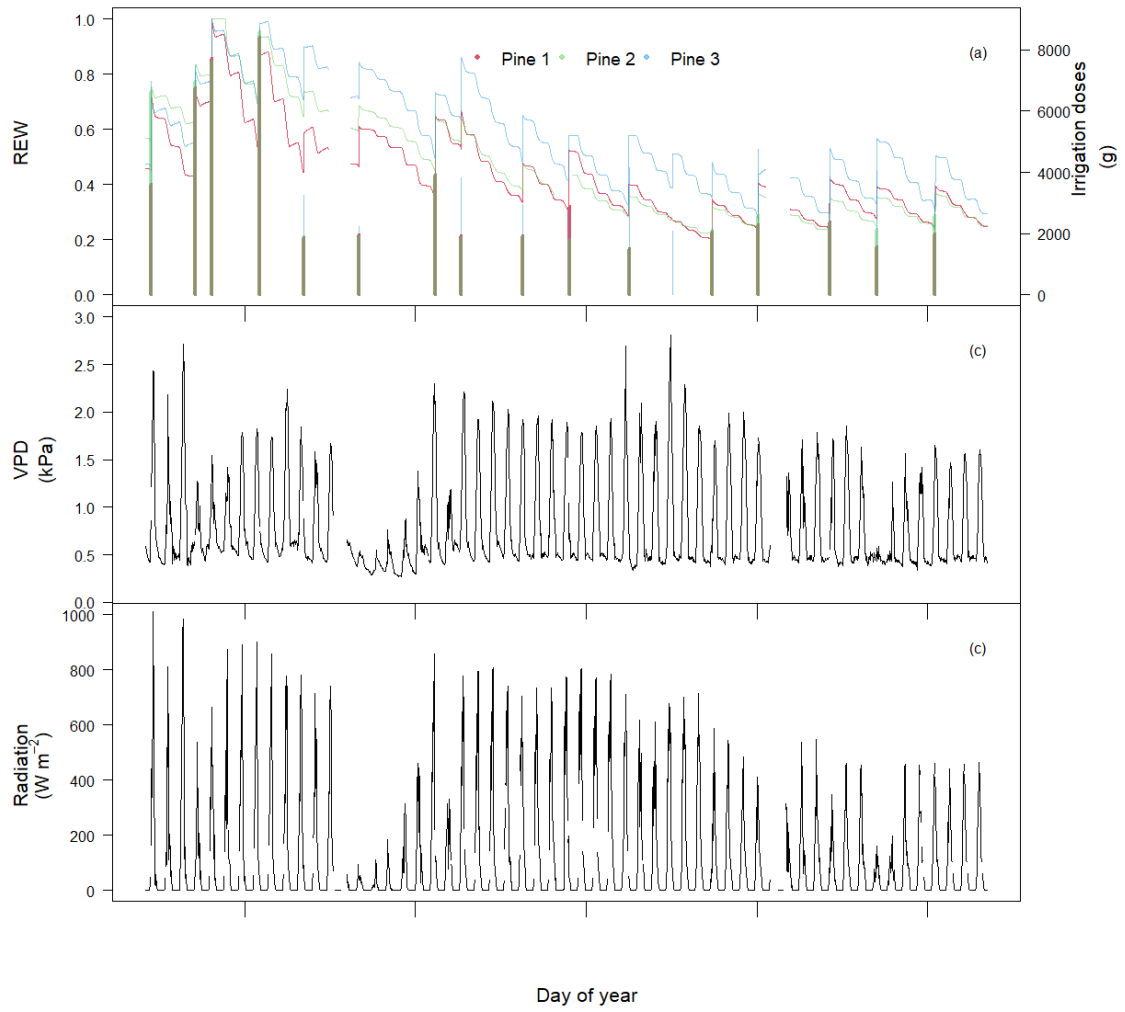

Figure C1. Representation of the transpiration and environmental conditions throughout the study period. Abbreviations: REW: relative extractable water; VPD: vapour pressure deficit.

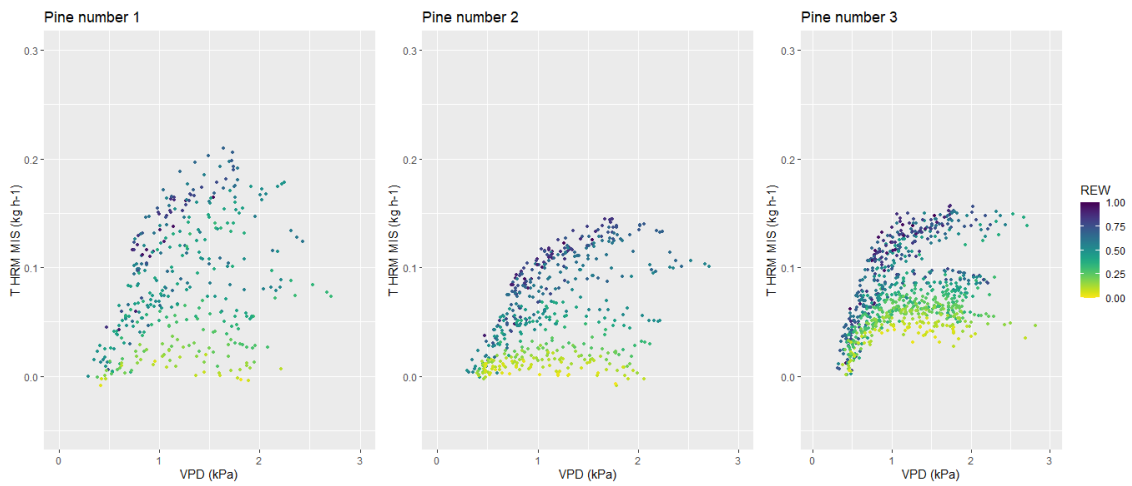

Figure D2. Representation of the response of the transpiration rate measured by the heat ratio method probes and corrected by Larsen's misalignment probes corrections ( $T_{HRM\ MIS}$ ) to the environmental variables interaction ( $VPD \times REW$ , vapour pressure deficit  $\times$  relative extractable water) in the three juvenile Aleppo pines. REW is represented as a gradient scale colour, where purple depicts wet conditions and yellow dry conditions. The figure is a graphical explanation of the models in Table D2.
